# Supplementary material
Source: PubMed Central journal article supplement (PMC4580274)
Supplement: NIHMS702170-supplement-1.pdf [file NIHMS702170-supplement-1.pdf]

## Supplementary Information

### Significantly shorter Fe-S bond in cytochrome P450-I is consistent with greater reactivity relative to chloroperoxidase

Courtney M. Krest,<sup>a</sup> Alexey Silakov, Jonathan Rittle, Timothy H. Yosca, Elizabeth L. Onderko, Julio C. Calixto, and Michael T. Green\*

Department of Chemistry, Penn State University, University Park, PA 16802

<sup>a</sup>Current address: Stanford Synchrotron Radiation Lightsource, SLAC National Accelerator Laboratory, Menlo Park, California, 94025

- 1) **Figure S1.** Fe K-edge XANES region for ferric and compound I forms of CPO and CYP119A1. (Page 2)
- 2) **Figure S2.** Pre-edge data for P450-I and CPO-I. (Page 3)
- 3) **Figure S3.** EXAFS of ferric P450. (Page 4)
- 4) **Figure S4.** Compound I Mössbauer spectra at 4.2 K. (Page 5)
- 5) **Figure S5.** EXAFS and Fourier transforms for CYP119A2-I and CYP158A2\*-I. (Page 6)
- 6) **Figure S6.** Variable temperature Mössbauer data and fits for CYP119A1-I and CPO-I. (Page 7)
- 7) **Figure S7.** Variable temperature Mössbauer data for ferric CYP119A1. (Page 8)
- 8) **Table S1.** Ground-state ( $S=1/2$ ) Mössbauer parameters used to simulate spectra presented in Figure 3 and S6. (Page 9)
- 9) **Table S2.** Temperature dependent relaxation parameters used for simulating Mössbauer spectra presented in Figure 3 and S6. (Page 9)
- 10) **Table S3.** Best fits for ferric P450 EXAFS data. (Page 10)
- 11) **Optimized coordinates for calculations.** (Page 11)

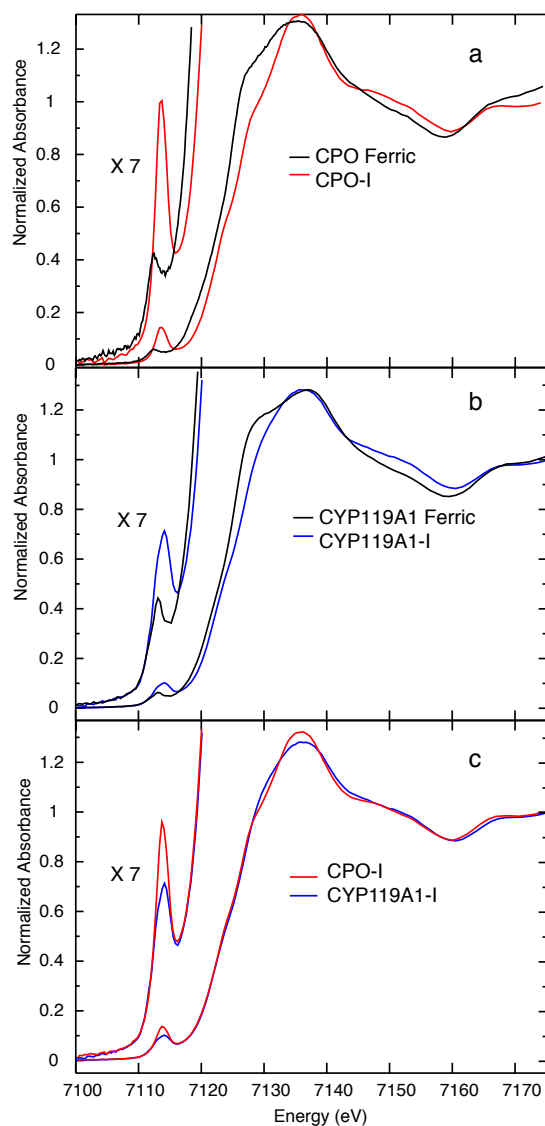

**Figure S1.** Fe K-edge XANES region showing the rising edge with the pre-edge expanded by a factor of 7. a) CPO ferric (blue), CPO-I (red). b) CYP119A1 ferric (blue), CYP119A1-I (black). c) Comparison of the XANES of both compound I species, CPO-I (red) CYP119A1-I (black).

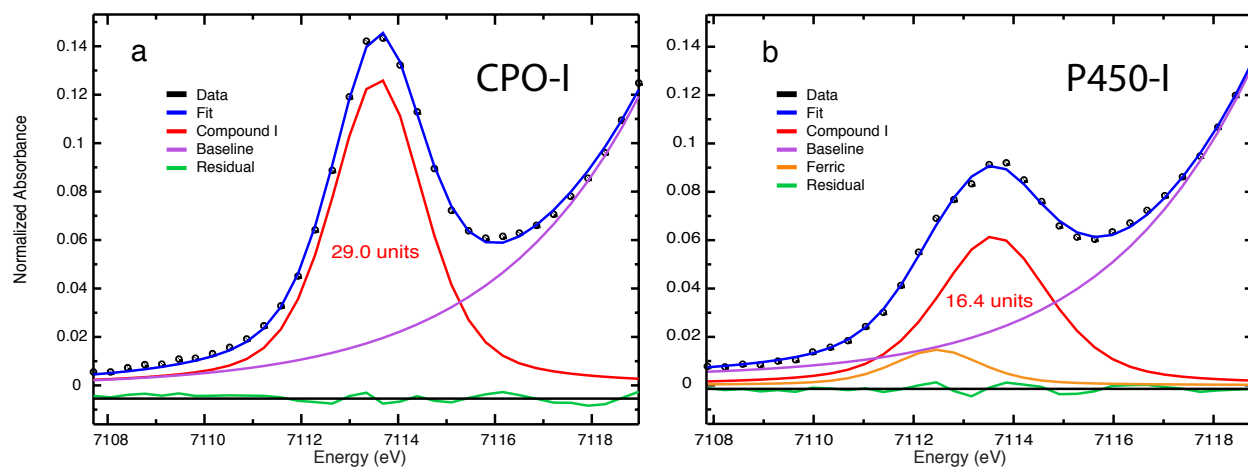

**Figure S2.** Representative pre-edge fits. Fits of the pre-edge data indicate that the CPO-I pre-edge (a) is  $14 \pm 8$  % larger than the CYP119A1-I pre-edge (b). Fits of P450-I data accounted for the contribution of  $\sim 30\%$  ferric enzyme. To obtain the final pre-edge area for P450-I, the value obtained from the fit must be scaled by 1.43 (i.e.  $1.0/0.7$ ).

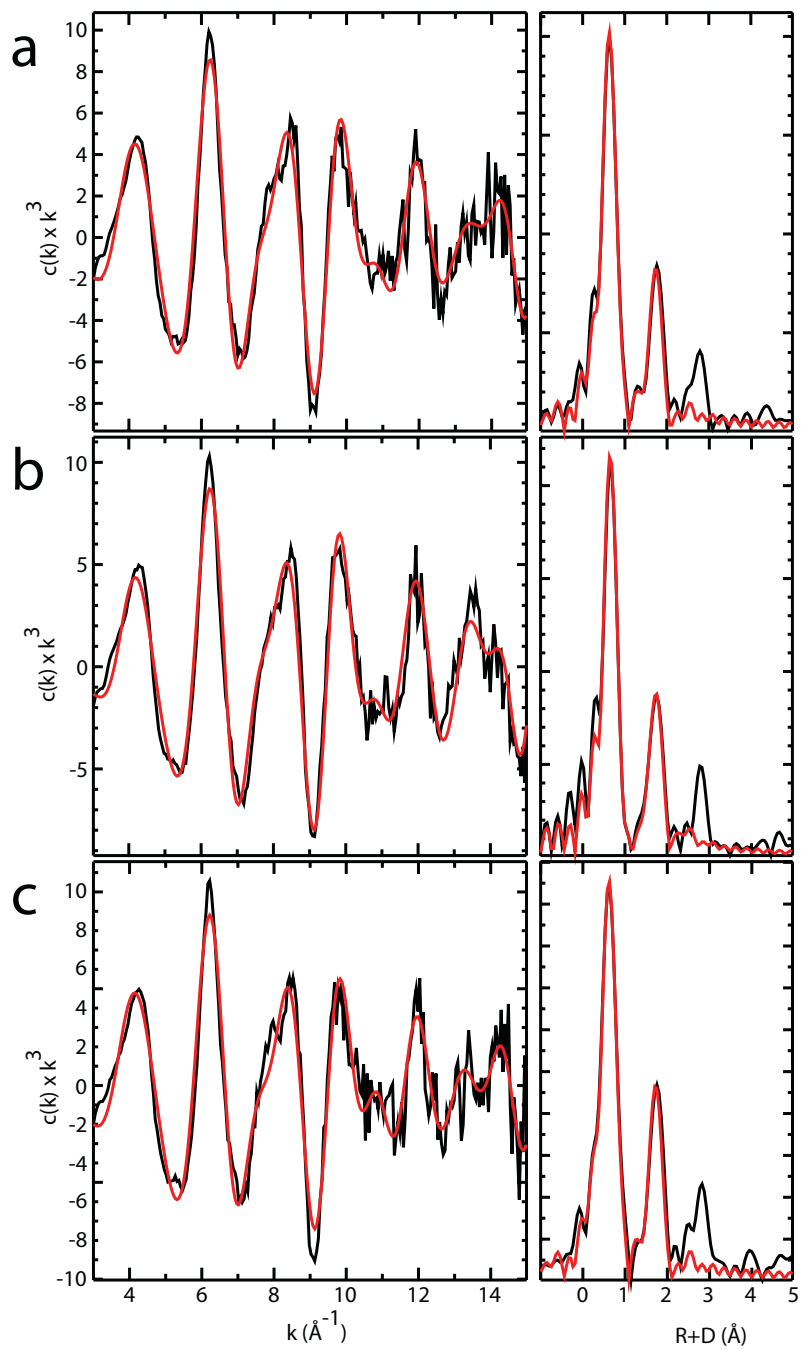

**Figure S3.** EXAFS and Fourier transforms for ferric P450 119A1(a), 158A2(b), and 119A2(c).

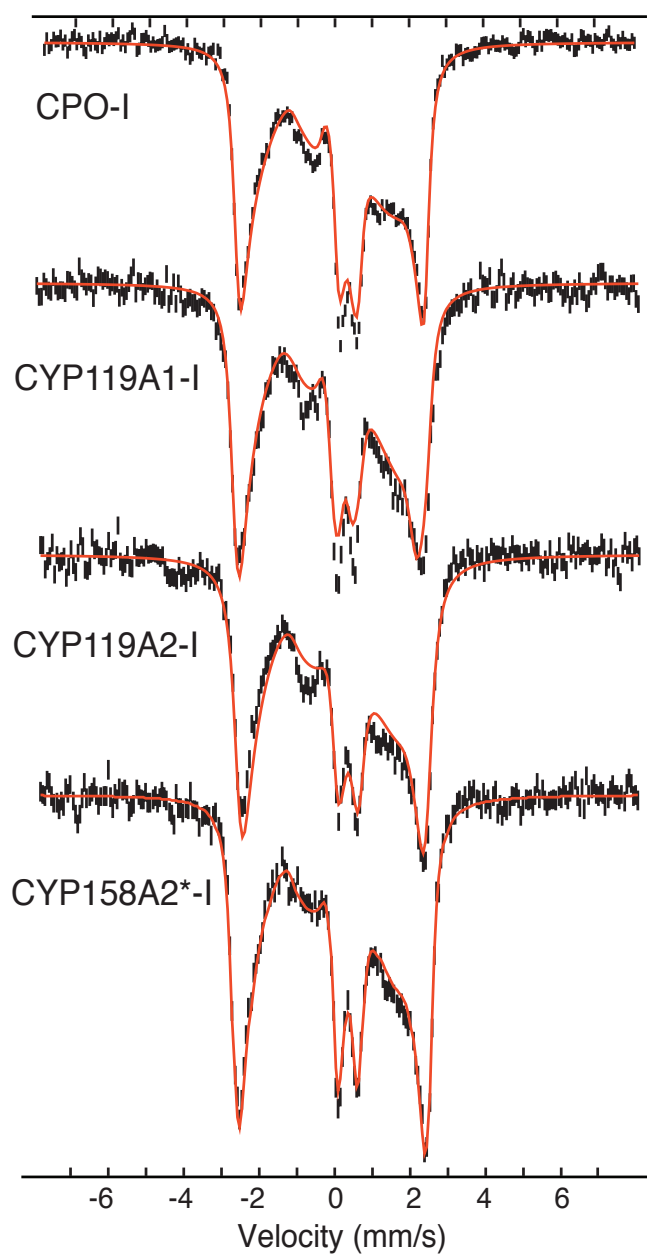

**Figure S4.** Mössbauer spectra of compound I at 4.2 K with 54-mT field applied parallel to the  $\gamma$ -beam. To obtain the P450-I spectra, contributions from ferric enzyme were subtracted from the raw data.

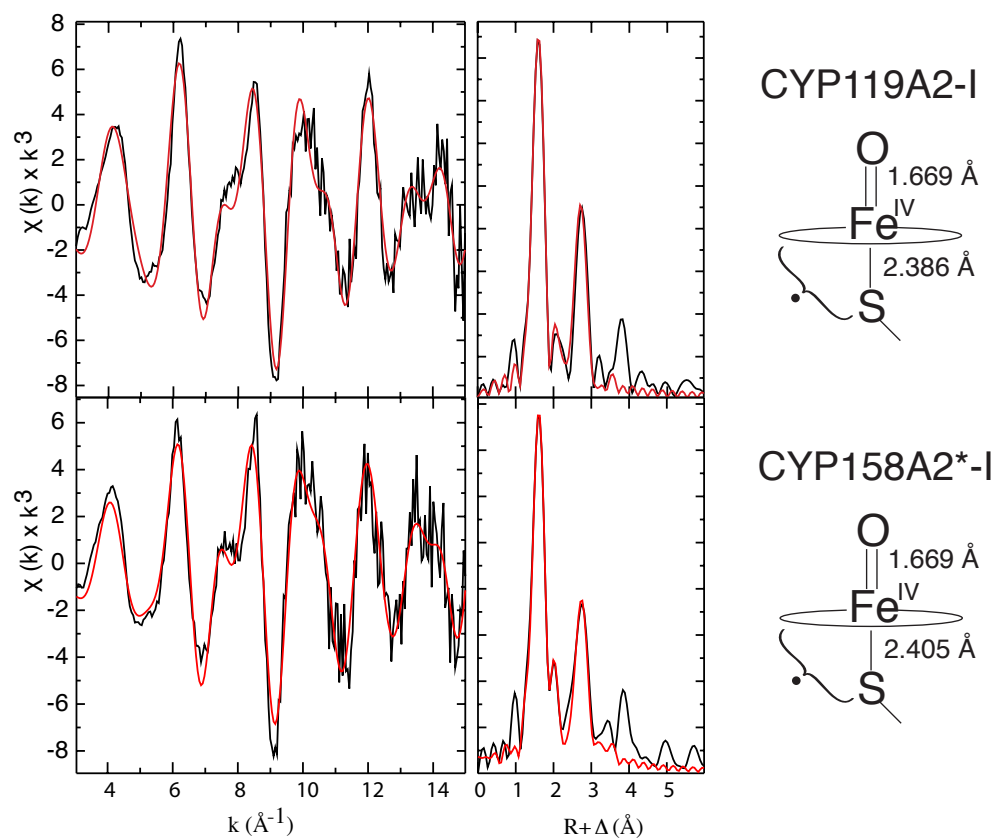

**Figure S5.** EXAFS and Fourier transforms for CYP119A2-I and CYP158A2\*-I.

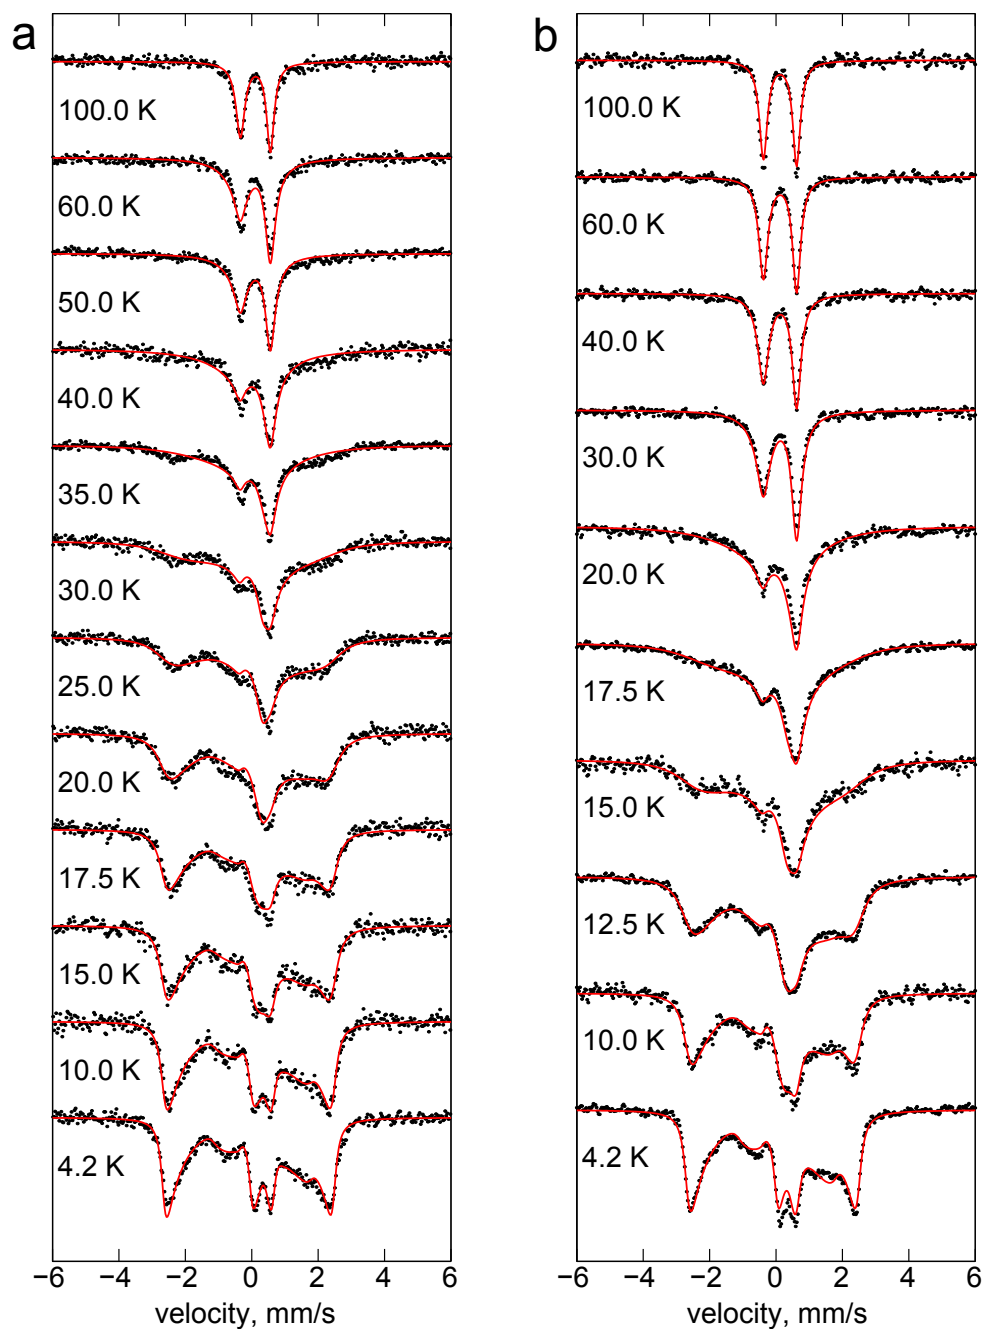

**Figure S6.** Variable temperature Mössbauer data and fits for CYP119A1-I (a) and CPO-I (b). To obtain the CYP119A1-I spectra, contributions from ferric enzyme (Fig. S4) were subtracted from the raw data. A 54-mT field was applied parallel to the  $\gamma$ -beam. Note that the Mössbauer spectrum of ferric CYP119A1 was found to be independent of temperature below  $\sim 40$ K. As a result, the 15K and 17.5K CYP119A1-I spectra were obtained by subtracting the 10K ferric spectrum from the raw data, while the 25K CYP119A1-I spectrum was obtained by subtracting the 20K ferric spectrum.

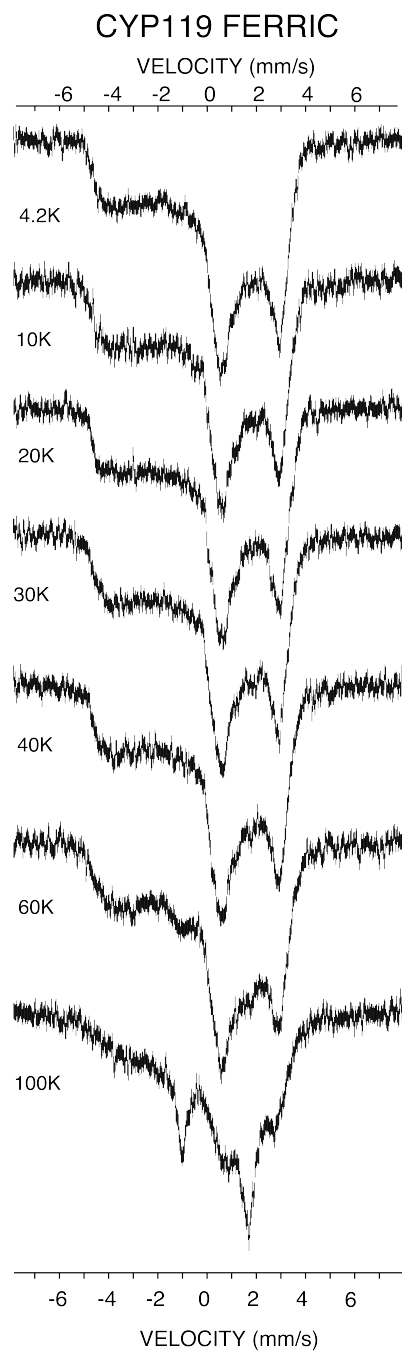

**Figure S7.** Variable temperature Mössbauer data for ferric CYP119A1. A 54-mT field was applied parallel to the  $\gamma$ -beam.



**Table S1.** Ground-state ( $S=1/2$ ) Mössbauer parameters used to simulate spectra presented in Figure 3 and S6.

|                 | $\delta$<br>(mm/s) | $\Delta E_Q$<br>(mm/s) | $g_x$ | $g_y$ | $g_z$ | $A_x$ (T) | $A_y$ (T) | $A_z$ (T) | FWHH*<br>(mm/s) |
|-----------------|--------------------|------------------------|-------|-------|-------|-----------|-----------|-----------|-----------------|
| <b>CPO-I</b>    | 0.13               | 0.96                   | 1.72  | 1.61  | 2.00  | -31       | -30       | -2        | 0.32            |
| <b>CYP119-I</b> | 0.11               | 0.90                   | 1.96  | 1.86  | 2.00  | -28       | -32       | -3        | 0.25            |

\* - FWHH stands for Full Width at Half Height of Lorentzian lineshape.

**Table S2.** Temperature dependent relaxation parameters used for simulating Mössbauer spectra presented in Figure 3 and S6.

| Temp.<br>(K) | Relaxation parameter ( $\times 10^6 \text{ s}^{-1}$ ) |         |         |          |
|--------------|-------------------------------------------------------|---------|---------|----------|
|              | CYP119-I                                              |         | CPO -I  |          |
|              | trial 1                                               | trial 2 | trial 1 | trial 2  |
| 10.0         | 2.41                                                  | 2.31    | 9.29    | 2.62     |
| 12.5         | -                                                     | -       | 17.87   | 18.44    |
| 15.0         | 5.54                                                  | 6.52    | 50.82   | 47.32    |
| 17.5         | 8.14                                                  | -       | 87.79   | -        |
| 20.0         | 14.55                                                 | 17.24   | 148.02  | 146.37   |
| 25.0         | 34.77                                                 | -       | -       | -        |
| 30.0         | 86.75                                                 | 73.43   | 659.20  | 698.21   |
| 35.0         | 137.37                                                | -       | -       | -        |
| 40.0         | 174.05                                                | 200.33  | 1548.31 | 1922.99  |
| 50.0         | 493.54                                                | -       | -       | -        |
| 60.0         | 446.16                                                | 451.16  | 3777.46 | 7069.86  |
| 100.0        | 2783.31                                               | 1358.13 | 7735.16 | 18771.33 |

**Table S3.** Best fits for ferric P450 EXAFS data. Each row corresponds to a best fit for data obtained from measurements on an independently prepared set of samples.

|                                     | Fe-N |              |            | Fe-S |              |            | E <sub>0</sub> | Error |
|-------------------------------------|------|--------------|------------|------|--------------|------------|----------------|-------|
|                                     | N    | R            | $\sigma^2$ | N    | R            | $\sigma^2$ |                |       |
| CYP119A1                            | 4    | 1.994        | 0.0011     | 1    | 2.219        | 0.0013     | -15.1          | 0.294 |
|                                     | 4    | 1.990        | 0.0013     | 1    | 2.212        | 0.0014     | -16.2          | 0.471 |
|                                     | 4    | 1.990        | 0.0011     | 1    | 2.216        | 0.0013     | -19.0          | 0.299 |
|                                     | 4    | 1.991        | 0.0014     | 1    | 2.210        | 0.0013     | -16.0          | 0.327 |
| <b>Average</b>                      |      | <b>1.992</b> |            |      | <b>2.214</b> |            |                |       |
| <b>90% Conf. Interval</b>           |      | <b>0.002</b> |            |      | <b>0.005</b> |            |                |       |
| CYP158A2*                           | 4    | 2.005        | 0.0009     | 1    | 2.2131       | 0.0025     | -14.1          | 0.272 |
| CYP119A2                            | 4    | 1.987        | 0.0014     | 1    | 2.2121       | 0.0014     | -16.8          | 0.338 |
| <b>Avg. (all P450s)<sup>a</sup></b> |      | <b>1.997</b> |            |      | <b>2.212</b> |            |                |       |
| <b>90% Conf. Interval</b>           |      | <b>0.009</b> |            |      | <b>0.004</b> |            |                |       |

<sup>a</sup>Average includes the distance obtained previously for ferric P450<sub>cam</sub>. (Ref. 3 of main text.)

## Optimized coordinates for calculations

All geometry optimization calculations were performed in Gaussian 03<sup>1</sup> with the B3LYP<sup>2</sup> functional, TZVP<sup>3</sup> basis set, and COSMO<sup>4</sup> with the dielectric for water. The Fe-S and Fe-O bonds were constrained to the experimental determined distances during geometry optimizations. Protoporphyrin IX was modeled as porphine ligand. Cysteine was modeled as a methyl thiolate ligand. Spectral calculations were done with ORCA. First using ORCA 2.8<sup>5</sup> a single point calculation was done using the optimized geometry from Gaussian, the B3LYP<sup>2</sup> functional, TZVP<sup>2</sup> basis set, and COSMO<sup>4</sup> with a dielectric of water. Next TD-DFT calculations were done in ORCA with the same geometry, using the previous B3LYP<sup>2</sup> result as an initial guess, the BP86<sup>6,7</sup> functional, TZVP basis set, and COSMO<sup>4</sup> with a dielectric of water, as well as core properties basis set, CP(PPP),<sup>8</sup> on the Fe atom. Plots of the results were made using the `orca_mapspc` feature in ORCA and orbitals were visualized using `orca_plot`.<sup>5</sup> Input files for pre-edge feature prediction were based on input files from Chandrasekaran *et al.*<sup>9</sup>

## CYP119-I

Geometry used for pre-edge calculation. Geometry was optimized with Fe-S and Fe-O distances constrained to the values obtained from EXAFS measurements.

|   |          |           |           |
|---|----------|-----------|-----------|
| N | 1.154797 | 1.735783  | -0.137600 |
| C | 2.511543 | 1.835373  | -0.004675 |
| C | 2.902711 | 3.220352  | 0.052806  |
| C | 1.763348 | 3.953437  | -0.050020 |
| C | 0.676200 | 3.015930  | -0.165527 |
| C | 3.396147 | 0.767303  | 0.069014  |
| C | 3.051992 | -0.571486 | -0.008597 |
| C | 3.990967 | -1.663390 | 0.020907  |
| C | 3.268486 | -2.806254 | -0.106751 |

|    |           |           |           |
|----|-----------|-----------|-----------|
| C  | 1.884620  | -2.417425 | -0.203635 |
| N  | 1.775961  | -1.055033 | -0.140126 |
| C  | 0.824372  | -3.306471 | -0.320122 |
| C  | -0.511740 | -2.958614 | -0.360745 |
| C  | -1.604743 | -3.891909 | -0.450772 |
| C  | -2.749834 | -3.163484 | -0.478329 |
| C  | -2.367509 | -1.775856 | -0.413029 |
| N  | -1.001377 | -1.671497 | -0.323650 |
| C  | -3.245996 | -0.707884 | -0.469124 |
| C  | -2.890939 | 0.635296  | -0.449408 |
| C  | -3.829904 | 1.725435  | -0.521442 |
| C  | -3.105307 | 2.872486  | -0.461684 |
| C  | -1.721938 | 2.486208  | -0.353280 |
| N  | -1.617018 | 1.118819  | -0.341457 |
| Fe | 0.086216  | 0.043043  | -0.361904 |
| O  | 0.186962  | 0.036458  | -2.028849 |
| C  | -0.661570 | 3.371614  | -0.266213 |
| S  | -0.042105 | -0.330976 | 2.005298  |
| C  | -1.695646 | 0.049849  | 2.666591  |
| H  | -1.683320 | -0.142819 | 3.738388  |
| H  | -1.965355 | 1.085327  | 2.467180  |
| H  | -2.436292 | -0.605131 | 2.202273  |
| H  | -3.457069 | 3.892513  | -0.485974 |
| H  | -4.899554 | 1.609054  | -0.604505 |
| H  | -4.300513 | -0.938401 | -0.550813 |
| H  | -3.767998 | -3.515307 | -0.544471 |
| H  | -1.491235 | -4.964541 | -0.487630 |

|   |           |           |           |
|---|-----------|-----------|-----------|
| H | 1.064505  | -4.360980 | -0.364554 |
| H | 3.621491  | -3.825917 | -0.128748 |
| H | 5.059443  | -1.551127 | 0.123126  |
| H | 4.446994  | 1.002928  | 0.178949  |
| H | 3.919185  | 3.567437  | 0.158186  |
| H | 1.650999  | 5.026773  | -0.045401 |
| H | -0.894840 | 4.428639  | -0.274837 |

### **CPO-I**

Geometry used for pre-edge calculation. Geometry was optimized with Fe-S and Fe-O distances constrained to the values obtained from EXAFS measurements.

|   |           |           |           |
|---|-----------|-----------|-----------|
| N | 1.153056  | 1.730718  | -0.129348 |
| C | 2.509895  | 1.831017  | 0.007733  |
| C | 2.899822  | 3.215992  | 0.070429  |
| C | 1.760726  | 3.948778  | -0.036180 |
| C | 0.674428  | 3.011301  | -0.158405 |
| C | 3.395513  | 0.764286  | 0.076700  |
| C | 3.051651  | -0.573919 | -0.008633 |
| C | 3.991499  | -1.664989 | 0.016892  |
| C | 3.270223  | -2.807990 | -0.116083 |
| C | 1.886325  | -2.419921 | -0.212434 |
| N | 1.775798  | -1.057635 | -0.143047 |
| C | 0.827141  | -3.309428 | -0.329920 |
| C | -0.508825 | -2.961061 | -0.365244 |
| C | -1.601369 | -3.894584 | -0.451201 |
| C | -2.747058 | -3.166684 | -0.472226 |
| C | -2.365506 | -1.779336 | -0.407615 |
| N | -0.998299 | -1.673637 | -0.323466 |

|    |           |           |           |
|----|-----------|-----------|-----------|
| C  | -3.245907 | -0.713279 | -0.458954 |
| C  | -2.891112 | 0.629332  | -0.440286 |
| C  | -3.830319 | 1.719274  | -0.508816 |
| C  | -3.105687 | 2.866488  | -0.453666 |
| C  | -1.721905 | 2.480926  | -0.350701 |
| N  | -1.616177 | 1.113105  | -0.337868 |
| Fe | 0.087931  | 0.039499  | -0.376309 |
| O  | 0.192220  | 0.044341  | -2.023003 |
| C  | -0.662517 | 3.367148  | -0.264486 |
| S  | -0.058124 | -0.359423 | 2.056884  |
| C  | -1.702894 | 0.070987  | 2.707938  |
| H  | -1.680230 | -0.050659 | 3.790379  |
| H  | -1.975185 | 1.090364  | 2.442545  |
| H  | -2.447817 | -0.615518 | 2.298495  |
| H  | -3.457712 | 3.886458  | -0.476587 |
| H  | -4.900376 | 1.602624  | -0.585978 |
| H  | -4.300477 | -0.944740 | -0.536480 |
| H  | -3.765371 | -3.518930 | -0.533828 |
| H  | -1.487432 | -4.967118 | -0.489678 |
| H  | 1.067305  | -4.363734 | -0.377996 |
| H  | 3.623970  | -3.827325 | -0.141286 |
| H  | 5.059712  | -1.552161 | 0.121268  |
| H  | 4.446102  | 1.000087  | 0.188396  |
| H  | 3.915740  | 3.563076  | 0.181245  |
| H  | 1.647896  | 5.022065  | -0.029669 |
| H  | -0.895900 | 4.424075  | -0.275919 |

## References

1. Frisch, M. J.; Trucks, G. W.; Schlegel, H. B.; Scuseria, G. E.; Robb, M. A.; Cheeseman, J. R.; Montgomery, J., J. A.; Vreven, T.; Kudin, K. N.; Burant, J. C.; Millam, J. M.; Iyengar, S. S.; Tomasi, J.; Barone, V.; Mennucci, B.; Cossi, M.; Scalmani, G.; Rega, N.; Petersson, G. A.; Nakatsuji, H.; Hada, M.; Ehara, M.; Toyota, K.; Fukuda, R.; Hasegawa, J.; Ishida, M.; Nakajima, T.; Honda, Y.; Kitao, O.; Nakai, H.; Klene, M.; Li, X.; Knox, J. E.; Hratchian, H. P.; Cross, J. B.; Bakken, V.; Adamo, C.; Jaramillo, J.; Gomperts, R.; Stratmann, R. E.; Yazyev, O.; Austin, A. J.; Cammi, R.; Pomelli, C.; Ochterski, J. W.; Ayala, P. Y.; Morokuma, K.; Voth, G. A.; Salvador, P.; Dannenberg, J. J.; Zakrzewski, V. G.; Dapprich, S.; Daniels, A. D.; Strain, M. C.; Farkas, O.; Malick, D. K.; Rabuck, A. D.; Raghavachari, K.; Foresman, J. B.; Ortiz, J. V.; Cui, Q.; Baboul, A. G.; Clifford, S.; Cioslowski, J.; Stefanov, B. B.; Liu, G.; Liashenko, A.; Piskorz, P.; Komaromi, I.; Martin, R. L.; Fox, D. J.; Keith, T.; Al-Laham, M. A.; Peng, C. Y.; Nanayakkara, A.; Challacombe, M.; Gill, P. M. W.; Johnson, B.; Chen, W.; Wong, M. W.; Gonzalez, C.; Pople, J. A. *Gaussian 03*, Revision E.01; Gaussian, Inc.: Wallingford, CT, 2004.
2. Devlin, F.; Finley, J.; Stephens, P.; Frisch, M., Ab Initio Calculation of Vibrational Absorption and Circular Dichroism Spectra Using Density Functional Force Fields: A Comparison of Local, Nonlocal, and Hybrid Density Functionals *J. Phys. Chem.* **1995**, *99*, 16883-16902.
3. Schafer, A.; Huber, C.; Ahlrichs, R., Fully optimized contracted Gaussian basis sets of triple zeta valence quality for atoms Li to Kr. *J. Chem. Phys.* **1994**, *100* (8), 5829-5835.
4. Klamt, A.; Schuurmann, G., COSMO: a new approach to dielectric screening in solvents with explicit expressions for the screening energy and its gradient. *J. Chem. Soc. Perk. Trans.* **1993**, *2* (5), 799-805.
5. Neese, F. *ORCA an Ab Initio, Density Functional, and Semiempirical Electronic Structure Program Package*, Version 2.8; Universitat Bonn, Germany, 2011.
6. Becke, A., Density-functional exchange-energy approximation with correct asymptotic behavior. *Phys Rev A* **1988**, *38* (6), 3098-3100.
7. Perdew, J., Density-functional approximation for the correlation energy of the inhomogeneous electron gas. *Physical Review B, Condensed Matter* **1986**, *33* (12), 8822-8824.
8. Neese, F., Prediction and interpretation of the <sup>57</sup>Fe isomer shift in Mössbauer spectra by density functional theory. *Inorganica Chimica Acta* **2002**, *337*, 181-192.
9. Chandrasekaran, P.; Stieber, S. C. E.; Collins, T. J.; Lawrence Que, J.; Neese, F.; DeBeer, S., Prediction of high-valent iron *K*-edge absorption spectra by time-dependent Density Functional Theory. *Dalton Transactions* **2011**, *40*, 11070-11079.
